# Supplementary material for: Geographic and Temporal Variability of Hepatitis E Virus Circulation in Non-Endemic Territories
Source: Preprints.org preprint supplement (doi:10.20944/preprints202211.0286.v1), 2022-11-15
Supplement: Supplementary file 1 [file supplementary]

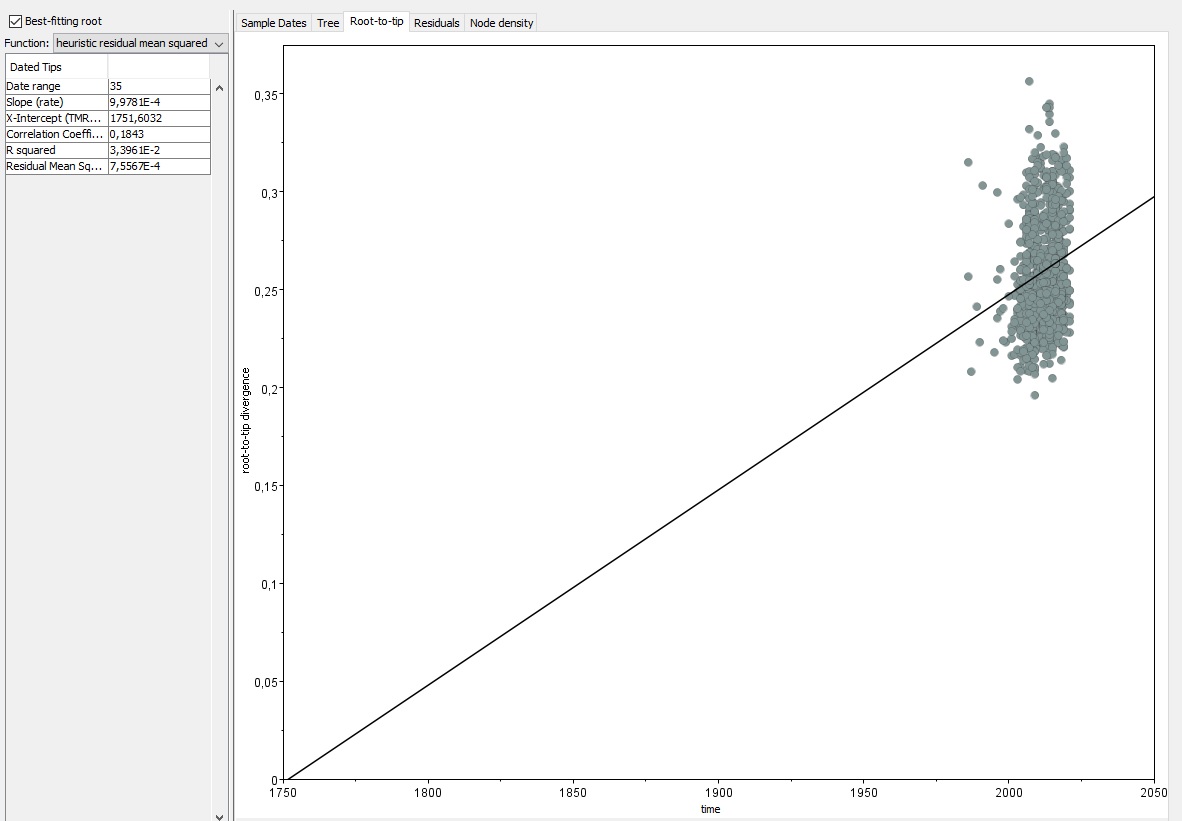


Supplementary figure S1. Temporal signal linear regression graph for HEV-3 ORF-2 300 nt fragment.

Supplementary table S1. Anti-HEV IgG antibody positivity rates in age cohorts of healthy volunteers in regions of the Russian Federation

| Region | Year | Anti-HEV IgG  N positive/N tested (%) in age cohorts | | | | | | |
| --- | --- | --- | --- | --- | --- | --- | --- | --- |
| 1-14 years | 15-19 years | 20-29 years | 30-39 years | 40-49 years | 50-59 years | ≥ 60 years |
| Kaliningrad Region | 2019 | 1/399  (0.3%) | 3/104  (2.9%) | 5/103  (4.9%) | 12/129  (9.3%) | 17/116  (14.7%) | 17/99  (17.2%) | 25/100  (25.0%) |
| St. Petersburg | 2020 | 3/467  (0.6%) | 2/129  (1.6%) | 40/1455  (2.7%) | 82/1961  (4.2%) | 39/669  (5.8%) | 21/401  (5.2%) | 23/246  (9.3%) |
| Belgorod Region | 2019 | 1/159 (0.6%) | 11/193 (5.7%) | 7/124 (5.6%) | 9/135 (6.7%) | 17/121 (14.1%) | 26/132 (19.7%) | 48/134 (35.8%) |
| Dagestan Republic | 2020 | 31/1985  (1.6%) | 8/545  (1.5%) | 6/755  (0.8%) | 6/550  (1.1%) | 7/277  (2.5%) | 10/307  (3.3%) | 135/530  (25.2%) |
| Moscow Region | 2008 | 19/455 (4.2%) | 4/152 (2.6%) | 3/104 (2.9%) | 5/100 (5.0%) | 6/105 (5.7%) | 10/114 (8.8%) | 42/149 (28.2%) |
| 2020 | 3/714  (0.4%) | 4/212  (1.9%) | 56/2012  (2.8%) | 110/2751  (4.0) | 60/1044  (5.7%) | 40/490  (8.2%) | 24/268  (9.0%) |
| Tatarstan Republic | 2020 | 4/271  (1.5%) | 6/93  (6.5%) | 15/103  (14.6%) | 21/112  (18.8%) | 14/108  (13.0%) | 13/111  (11.7%) | 18/119  (15.1%) |
| Sverdlovsk Region | 2008 | 2/421 (0.5%) | 1/100 (1.0%) | 1/81 (1.2%) | 4/106 (3.8%) | 5/104 (4.8%) | 5/107 (4.7%) | 9/108 (8.3%) |
| 2021 | 5/233  (2.2%) | 0/204  (0.0%) | 1/51  (2.0%) | 11/147  (7.5%) | 7/102  (6.9%) | 8/99  (8.1%) | 10/99  (10.1%) |
| Tuva Republic | 2008 | 3/388 (0.8%) | 2/100 (2.0%) | 3/100 (3.0%) | 9/100 (9.0%) | 6/100 (6.0%) | 12/100 (12.0%) | 19/123 (15.5%) |
| 2019 | 7/359 (1.9%) | 4/167 (2.4%) | 4/147 (2.7%) | 7/169 (4.1%) | 7/112 (6.3%) | 19/108 (17.6%) | 20/99 (20.2%) |
| Novosibirsk Region | 2020 | 16/2096  (0.8%) | 13/913  (1.4%) | 40/1602  (2.5%) | 35/1615  (2.2%) | 22/829  (2.7%) | 22/519  (4.2%) | 79/757  (10.4%) |
| Sakha Republic (Yakutia) | 2008 | 2/406 (0.5%) | 0/100 (0.0%) | 2/123 (1.6%) | 1/100 (1.0%) | 3/100 (3.0%) | 2/99 (2.0%) | 11/97 (11.3%) |
| 2018 | 7/402 (1.7%) | 2/99 (2/0%) | 8/117 (6.8%) | 6/119 (5.0%) | 4/101 (4/0%) | 12/116 (10.3%) | 13/118 (11.0%) |
| Khabarovsk Region | 2008 | 2/397 (0.5%) | 3/99 (3.0%) | 1/101 (1.0%) | 3/99 (3.0%) | 2/100 (2.0%) | 3/100 (3.0%) | 8/99 (8.1%) |
| 2020 | 17/1770  (1.0%) | 13/527  (2.5%) | 24/713  (3.4%) | 27/624  (4.3%) | 15/294  (5.1%) | 19/333  (5.7%) | 41/509  (8.1%) |

Supplementary table S2. HEV RNA detection rates in piglets aged 2-4 months

| Region | Farm # | Number of faecal samples | Number of HEV RNA positive samples (%) |
| --- | --- | --- | --- |
| Kaliningrad | 1 | 57 | 5 (8.77%) |
| 2 | 64 | 28 (43.75%) |
| 3 | 76 | 0 (0.00%) |
| 4 | 60 | 0 (0.00%) |
| Arkhangelsk | 1 | 37 | 9 (24.32%) |
| 2 | 81 | 19 (23.46%) |
| 3 | 137 | 24 (17.52%) |
| Belgorod | 1 | 69 | 5 (7.25%) |
| 2 | 107 | 4 (3.74%) |
| 3 | 101 | 50 (49.50%) |
| 4 (2012) | 74 | 17 (22.97%) |
| 4 (2013) | 75 | 19 (25.33%) |
| 4 (2016) | 100 | 20 (20.00%) |
| Vladimir | 1 | 43 | 26 (60.47%) |
| Saratov | 1 | 99 | 7 (7.07%) |
| 2 | 92 | 28 (30.43%) |
| 3 | 91 | 45 (49.45%) |
| Sverdlovsk | 1 | 52 | 20 (38.46%) |
| 2 | 100 | 5 (5.00%) |
| 3 | 82 | 5 (6.10%) |
| Khabarovsk | 1 | 128 | 26 (20.31%) |
| 2 | 107 | 0 (0.00%) |
| 3 | 84 | 2 (2.38%) |
